# Supplementary material for: Tuning the relative affinities for activating and repressing operators of a temporally regulated restriction-modification system
Source: PubMed Central journal article supplement — Nucleic Acids Res. 2009 Jan 6;37(3):983–98. doi: 10.1093/nar/gkn1010 (PMC2647307; doi:10.1093/nar/gkn1010), 2009-01-06
Supplement: gkn1010_1.pdf [file gkn1010_1.pdf]

## **Supplementary data for:**

### **TUNING THE RELATIVE AFFINITIES FOR ACTIVATING AND REPRESSING OPERATORS OF A TEMPORALLY-REGULATED RESTRICTION-MODIFICATION SYSTEM**

**Iwona Mruk<sup>1,2</sup> and Robert M. Blumenthal<sup>1,3\*</sup>**

<sup>1</sup>Department of Medical Microbiology and Immunology

<sup>2</sup>Department of Microbiology, University of Gdansk, Gdansk, 80-822, Poland

<sup>3</sup>Program in Bioinformatics and Proteomics/Genomics, University of Toledo Health Sciences Campus, Toledo, OH 43614-2598, USA

#### **SUPPLEMENTAL TABLES AND FIGURES**

All used methods were the same as those described in the text of the paper.

**Table S1.** Plasmids used in this study

| <b>Name</b>   | <b>Relevant feature(s)</b>                                                                                                                                                  | <b>Reference</b> |
|---------------|-----------------------------------------------------------------------------------------------------------------------------------------------------------------------------|------------------|
| pACYC177      | cloning vector (AmpR, KanR)                                                                                                                                                 | (1)              |
| pACYC-kan     | as pACYC177, but <i>bla</i> gene deleted (AmpS, KanR)                                                                                                                       | This study       |
| pBAD24        | arabinose inducible <i>araBAD</i> promoter, <i>araC</i> , AmpR, ColE1 ori                                                                                                   | (2)              |
| pBadMTwt      | WT <i>pvullM</i> under control of <i>araBAD</i> promoter in pBAD24, ColE1 ori, AmpR                                                                                         | This study       |
| pBadMT2       | as pBadMTwt, but M.PvuII two substitutions: N4S (AAU-AGU) and S10R (AGC-CGC)                                                                                                | This study       |
| pBadMT3       | as pBadMT2, but additional third M.PvuII substitution M8L (AUG-UUG)                                                                                                         | This study       |
| pBadMTwt-kan  | WT <i>pvullM</i> under control of <i>araBAD</i> promoter in pBAD24, p15A ori, KanR                                                                                          | This study       |
| pBadMT2-kan   | as pBadMT2, but p15A ori, KanR                                                                                                                                              | This study       |
| pBadMT3-kan   | as pBadMT3, but p15A ori, KanR                                                                                                                                              | This study       |
| pBend2        | cloning vector for DNA bending analysis                                                                                                                                     | (3)              |
| pBR322        | cloning vector (AmpR, TetR)                                                                                                                                                 | (4)              |
| pDK178 (WWWW) | transcriptional fusion of <i>pvullC</i> promoter including C boxes with the symmetrical core - WWWW (GATCcat AGCTtgtaGACTcaaAGCT) to the <i>cat</i> gene in pKK232-8        | (5)              |
| pDK435        | transcriptional fusion of <i>pvullC</i> promoter including WT C boxes (positions -93 to +88) in front of promoterless <i>lacZ</i> reporter gene in pKK232-8, TetR, p15A ori | (5)              |
| pIM1          | <i>pvullC</i> under control of <i>araBAD</i> promoter in pBAD24, AmpR, ColE1 ori                                                                                            | (5)              |
| pIM2          | Kan cassette inserted to break <i>bla</i> gene in pIM1, KanR, ColE1 ori                                                                                                     | (5)              |
| pIM4          | as pIM2 but p15A ori                                                                                                                                                        | (5)              |
| pIM6          | nonrepression mutant, as pPvuRM3.4, but C box (GACTcatAGTctgtaGACTcaaGATC)                                                                                                  | (5)              |
| pIM8          | as pDK435, but symmetrized C-box, as for pDK178                                                                                                                             | (5)              |
| pIM9          | as pPvuRM3.4, but symmetrized C-box, as nonrepression mutant pIM6                                                                                                           | (5)              |
| pIM10         | as pIM8, but mutation in spacer of O <sub>R</sub> (GACTcatAGTctgtaGACTcatGATC)                                                                                              | This study       |
| pIM13         | as pIM8, but mutation in spacer of O <sub>L</sub> (GACTcaaAGTctgtaGACTcaaGATC)                                                                                              | This study       |
| pIM14         | as pIM8, but mutation in both spacers of O <sub>L</sub> and O <sub>R</sub> (GACTcaaAGTctgtaGACTcatGATC)                                                                     | This study       |
| pIM17         | as pPvuRM3.4 but mutation in spacer of O <sub>R</sub> (as pIM10)                                                                                                            | This study       |
| pIM18         | as pPvuRM3.4 but mutation in spacer of O <sub>L</sub> (as pIM13)                                                                                                            | This study       |

|               |                                                                                                                                                                                            |            |
|---------------|--------------------------------------------------------------------------------------------------------------------------------------------------------------------------------------------|------------|
| pIM19         | as pPvuRM3.4 but mutation in both spacers of O <sub>L</sub> and O <sub>R</sub> (as pIM14)                                                                                                  | This study |
| pIM20         | as pPvuRM3.4, but symmetrized C-box, as pDK178                                                                                                                                             | This study |
| pIM22         | as pDK178, but symmetrized C-box with mutation in spacer of O <sub>L</sub> (as pIM13)                                                                                                      | This study |
| pIM57         | as pDK435, symmetrized C-box, intra-operator variant (GACTTATAGTCtgaGACTtatGATC)                                                                                                           | This study |
| pIM58         | as pDK435, symmetrized C-box, intra-operator variant (GACTTATAGTCtgaGACTcgcGATC)                                                                                                           | This study |
| pIM67         | as pDK435, symmetrized C-box, intra-operator variant (GACTcgcAGTCtgaGACTtatGATC)                                                                                                           | This study |
| pIM68         | as pDK435, symmetrized C-box, intra-operator variant (GACTcgcAGTCtgaGACTcgcGATC)                                                                                                           | This study |
| pWWWR         | as pDK178, but symmetrized C-box with mutation in 2A box of O <sub>R</sub> (as pIM6), WT spacers, non-repressing                                                                           | (5)        |
| pKK232-8      | promotorless <i>cat</i> reporter gene                                                                                                                                                      | (6)        |
| pLex3B        | vector for testing gene translational fusion to LacZ                                                                                                                                       | (7)        |
| pLex-met1     | as pLexB but WT <i>pvullM</i> 5' fragments fused in the same open reading frame to LacZ (starting with codons for M <sub>1</sub> M <sub>2</sub> TLNLQTM <sub>3</sub> SSNDM <sub>4</sub> L) | This study |
| pLex-met2     | as pLex-met1 but M <sub>3</sub> (ATG) codon mutated to L (TTG) (codons M <sub>1</sub> M <sub>2</sub> TLNLQT <sub>L</sub> SSNDM <sub>4</sub> L)                                             | This study |
| pLex-met3     | as pLex-met1 but M <sub>4</sub> (ATG) codon mutated to L (TTG) (codons M <sub>1</sub> M <sub>2</sub> TLNLQTM <sub>3</sub> SSND <sub>L</sub> L)                                             | This study |
| pLex-met4     | as pLex-met1 but M <sub>1</sub> (ATG) codon mutated to L (TTG) (codons <sub>L</sub> M <sub>2</sub> TLNLQTM <sub>3</sub> SSNDM <sub>4</sub> L)                                              | This study |
| pLex-met5     | as pLex-met1 but M <sub>2</sub> (ATG) codon mutated to L (TTG) (codons M <sub>1</sub> <sub>L</sub> TLNLQTM <sub>3</sub> SSNDM <sub>4</sub> L)                                              | This study |
| pPvuRM3.4     | WT Pvull R-M system in pBR322 backbone                                                                                                                                                     | (8)        |
| pPvuM1.9-ACYC | as pPvuM1.9 (M+R-C-), but p15A ori, Cm <sup>R</sup>                                                                                                                                        | (8)        |
| pUCx7Pvull    | pUC19 with 7 Pvull sites                                                                                                                                                                   | This study |

---

| A | Protein | Source                                | 1A                                 | 1B | 2A | 2B | #Diffs: spacers | symms |
|---|---------|---------------------------------------|------------------------------------|----|----|----|-----------------|-------|
|   | SnaB1   | <i>Sphaerotilus natans</i>            | GAATACT-ATGGTATGTAGACCTGGGGTCTTC   |    |    |    | 3               | 3     |
|   | BstLV1  | <i>Geobacillus stearothermoph.</i> LV | TGCTATTAAATAGTCTGTGCGATTATATAACATC |    |    |    | 1               | 3     |
|   | LlaDI   | <i>Lactococcus lactis cremoris</i>    | ATATAATATCATAAATGTCACTCATAGTCTAT   |    |    |    | 3               | 5     |
|   | PvuII   | <i>Proteus vulgaris</i>               | TGCTACTCATAGTCTGTAGATTCAAAGTCATC   |    |    |    | 1               | 2     |
|   | Cgl?    | <i>Corynebacterium glutamicum</i>     | TGATACTCATAGAGTGTAGATCTATAGTCTGC   |    |    |    | 1               | 5     |
|   | SbaI    | <i>Salmonella bareilly</i>            | TGCTACTCATAGTCTGTAGATCTATTGTGCATC  |    |    |    | 1               | 4     |
|   | SptAI   | <i>Salm. cholerae</i> (paratyphi A)   | TGCTACTCATAGTCTGTAGATCTATTGTGCATC  |    |    |    | 1               | 4     |
|   | SmaI    | <i>Serratia marcescens</i>            | TGCTACTCATCGTCTGTGCGACTTATAGTCTATC |    |    |    | 1               | 2     |
|   | Sse9I   | <i>Sporosarcina species 9</i>         | TAACTGCCGAGAGTGTAGATCATCGGCGCCG    |    |    |    | 3               | 6     |
|   | Mgt?    | <i>Magnetococcus sp.</i> MC-1         | TGATACTCTCTGGATGTCTACTCATAGTGTTC   |    |    |    | 2               | 3     |
|   | Gur     | <i>Geobacter uraniumreducens</i>      | TGCTACTTAAAGTCTGTAGACTCATAAGCATC   |    |    |    | 2               | 3     |
|   | BclI    | <i>Bacillus caldolyticus</i>          | TGTCACTTAAAGTCTGTAGACTTATAGTCTAC   |    |    |    | 1               | 1     |
|   | BamHI   | <i>Bacillus amyloliquefaciens</i>     | TGTAACCTTATAGTCTGTAGCCCT-ATAGTCTAC |    |    |    | 1               | 2     |
|   | Vei?    | <i>Verminephrobacter eiseniae</i>     | TGAAACTTATAGTCTGTAGATTCAAAGTTGTTC  |    |    |    | 2               | 3     |
|   | Cef?    | <i>Corynebact. efficiens</i> pCE3     | TGAGTTGTATTGTCTGTAGATTCATAGTCTAC   |    |    |    | 1               | 3     |
|   | Lsp?    | <i>Lyngbya sp.</i> PCC8106            | TGCTACTTATAGTCTGTAGACAGAGATCATC    |    |    |    | 2               | 3     |
|   | SonI?   | <i>Shewanella oneidensis</i> pMR-1    | TGCTACTTATAGTCTGTAGACTTAAAGTGTTC   |    |    |    | 1               | 2     |
|   | NmeSI   | <i>Neisseria meningitidis</i>         | TGCTACTTATAGAGTGTAGACTTAAAGTATTC   |    |    |    | 1               | 3     |
|   | Det?    | <i>Dehalococcoides ethenogenes</i>    | TGATACTTATAGTCTGTAGACCTATAGTCTAC   |    |    |    | 0               | 2     |
|   | Npu?    | <i>Nostoc punctiforme</i>             | AGTTATTATATAATGTAGACTTATACCCGTGC   |    |    |    | 0               | 5     |
|   | BcnI    | <i>Brevibacillus centrosporus</i>     | TGTTACTTATTGTCTGAAGACTTGTGAGAAT    |    |    |    | 1               | 5     |

O<sub>L</sub> O<sub>R</sub>

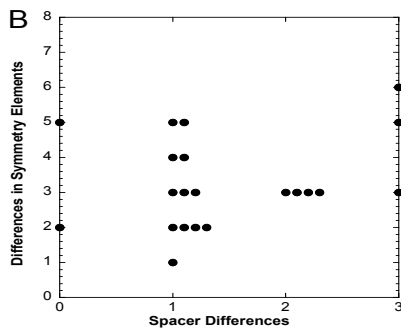

|                |       | O <sub>R</sub> |     |     |     |     |     |     |     |     |       |   |
|----------------|-------|----------------|-----|-----|-----|-----|-----|-----|-----|-----|-------|---|
|                |       | -AT            | ATC | CAA | CAT | GAG | TAA | TAT | TGT | TTG | (Tot) |   |
| O <sub>L</sub> | -AT   |                |     |     |     |     |     |     |     | 1   | 1     |   |
|                | AAT   |                |     |     |     |     |     | 1   |     |     | 1     |   |
|                | ATC   |                |     |     | 1   |     |     |     |     |     | 1     |   |
|                | CAT   |                |     | 1   |     |     |     | 4   |     |     | 5     |   |
|                | CGA   |                | 1   |     |     |     |     |     |     |     | 1     |   |
|                | CTC   |                |     |     | 1   |     |     |     |     |     | 1     |   |
|                | TAA   |                |     |     | 1   |     |     | 1   |     |     | 2     |   |
|                | TAT   | 1              |     | 1   | 1   | 1   | 2   |     |     | 1   |       | 9 |
|                | (Tot) | 1              | 1   | 2   | 4   | 1   | 2   | 8   | 1   | 1   | 21    |   |

**Figure S1. Control region for the PvuII regulation R-M system.**

(A) Comparison of upstream regions from known and some putative C protein-coding genes of the C.PvuII-like subfamily, which have predicted recognition helices containing HRTY. The shaded nucleotides indicate the C-box symmetrical cores, where 1A and 1B form operator left (O<sub>L</sub>) and 2A and 2B form operator right (O<sub>R</sub>). The proposed consensus sequence for this region is GATC-TAT-AGTC-TGTA-GATC-TAT-AGTC, as explained in Figure 1 of the main text. Any difference from this consensus within the symmetrical boxes or intra-operator spacers is indicated by red font, and the number of differences is shown in columns to the right. Two exact matches to consensus for the intra-operator spacers are highlighted in blue. A question mark in the name indicates hypothetical C proteins.

(B) Using data from Figure S1A, the relationship is shown between O<sub>L</sub>/ O<sub>R</sub> variation in GATCnnnAGTC vs. that in the intra-operator spacers.

(C) The distribution of specific pairs of intra-operator spacers is shown. Dark red boxes indicate occurrences of identical spacers; only two cases are known (blue shading in Figure S1A).

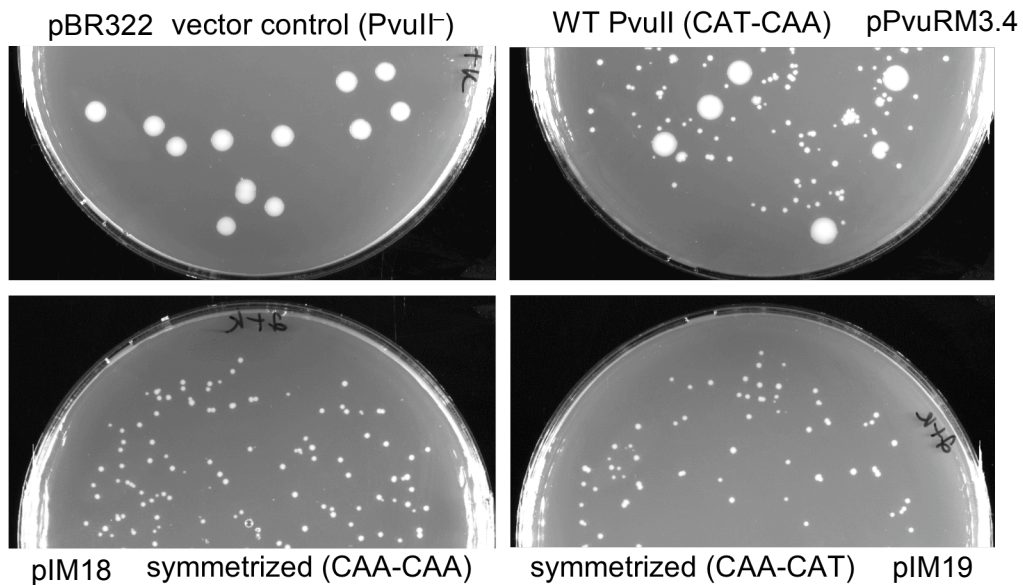

**Figure S2. The effect of altered spacers in  $O_R$  and  $O_L$  of C-boxes on PvuII R-M system maintenance.**

Plasmid DNAs carrying the intact PvuII R-M system and its C-box spacer variants were used. These plasmids were introduced into competent *E. coli* TOP10 [pPvuM1.9-ACYC;  $Cm^R$ ], cells that already carry a plasmid specifying PvuII MTase ( $M^+$ ). These cells were again transformed with pACYC-kan ( $M^-$ ) and grown without antibiotics for 2 h, to allow plasmid segregation.

As they are mutually incompatible, either pPvuM1.9-ACYC ( $M^+$ ) or pACYC-kan ( $M^-$ ) should be lost. Transformants were plated with selection for the R-M system plasmid ( $Ap^R$ ) and pACYC-kan ( $M^-$ ) ( $Km^R$ ). Lack of  $Ap^R$   $Km^R$  segregants indicate inability to maintain the R-M system variant without additional MTase expression. Plates with transformants, after overnight incubation, showed colonies for the following C-box spacer variants: pPvuRM3.4 (WT), pIM20 (CAT/CAA, Sym) and pBR322 control (no R-M system). No colonies were seen for IM18 (CAA/CAA, Sym) and pIM19 (CAA/CAT) (Table 2 of main text; not shown). However, when the same plates were incubated an additional 2 days, the growth of smaller colonies was detected (as shown here). These tiny colonies were tested and determined to possess all three plasmids as indicated by antibiotic resistance for  $Ap^R$ ,  $Km^R$  and  $Cm^R$ , unlike the larger colonies that have only two antibiotic resistance markers  $Ap^R$  and  $Km^R$ .

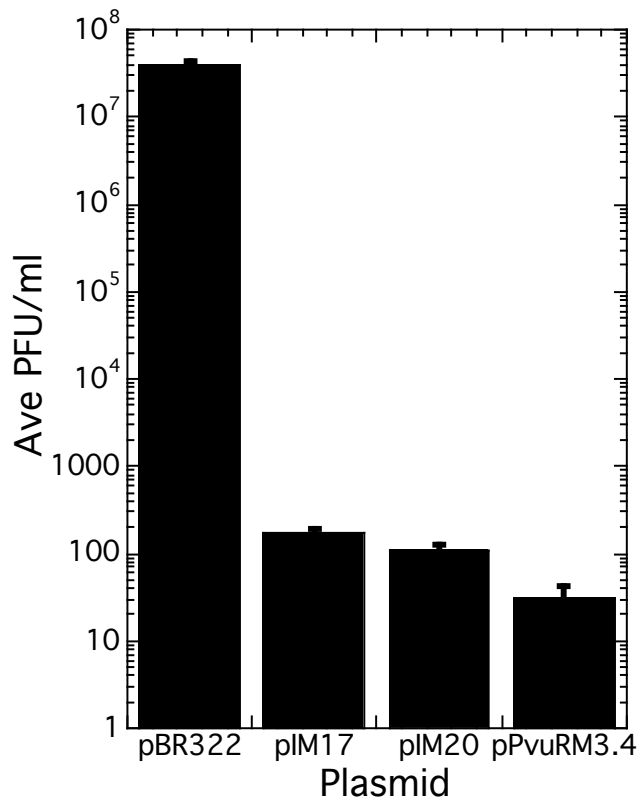

**Figure S3. Restriction assay.**

The restriction activity of *E. coli* cells carrying PvuII R-M system and its variants was measured through the plaquing efficiency of phage  $\lambda vir$ . The average PFU (plaque-forming units) is shown. The average comes from four replicates at each of two phage dilutions differing by 10-fold. Error bars indicate standard error of the mean. As the same phage stock was used in all cases, lower bar heights reflect increased restriction. pBR322 is a nonrestricting vector control, pPvuRM3.4 is the WT PvuII R-M system (positive control), and the two pIM plasmids are variants that are described in the main text. These data (and more) were used to calculate the relative efficiency of  $\lambda vir$  plaquing (EOP) shown in Table 2 of the main text

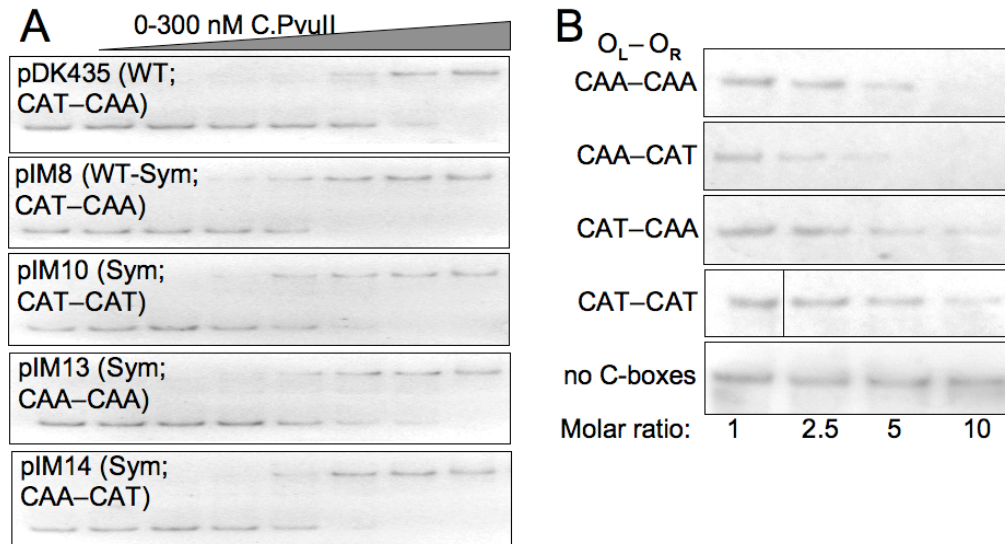

**Figure S4. *In vitro* interaction of C.PvuII protein with wild-type and altered C-box regions.**

**(A)** EMSA (electrophoretic mobility shift assay) reactions were processed as outlined in the main text. Quantitation of these results are shown in Figure 3A. “WT” refers to the native PvuII C-boxes and spacers; the others all have symmetrized spacers with varied intra-operator spacers as indicated.

**(B)** EMSA competition assays were performed using 200 nM of C.PvuII and 20 nM of biotin-labeled WT C-box 126-mer (as described in Methods). Competition reactions contained increasing amounts of unlabeled 126-mer DNA fragments (from 1- to 10-fold molar excess). The competitor DNAs contained the indicated intra-operator spacers, but were otherwise identical. Following EMSA and electroblotting, the shifted bands for each reaction were visualized and quantified via chemiluminescent detection of the biotinylated DNA as described in Methods.

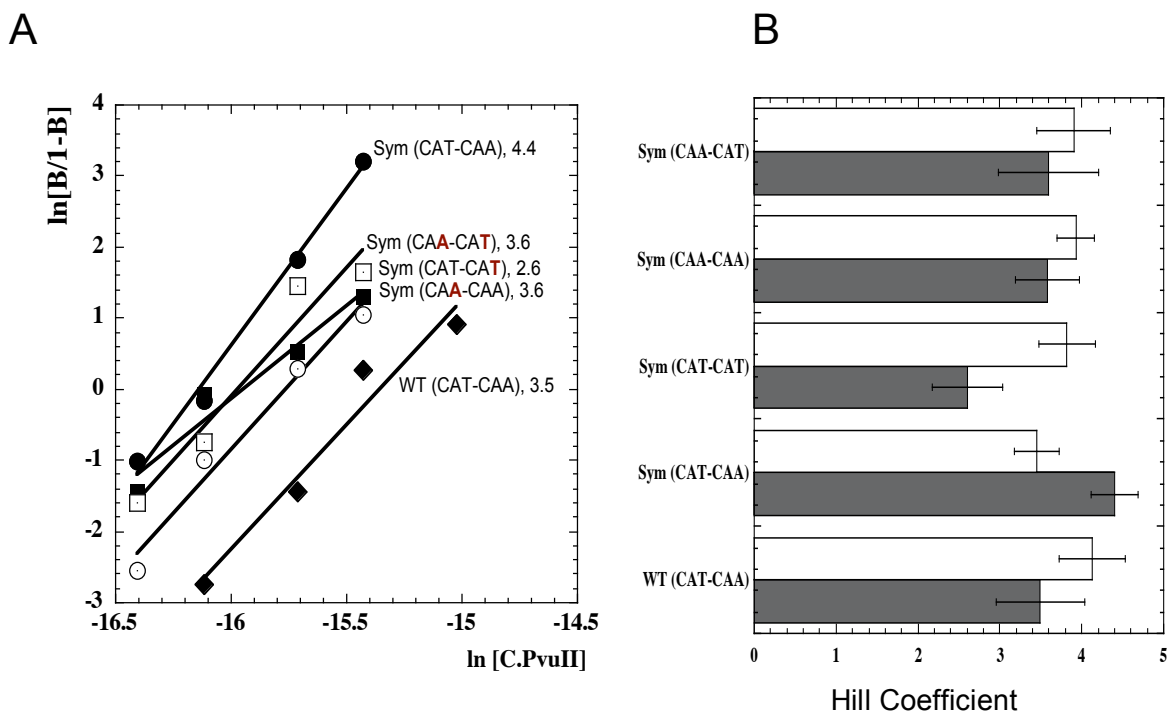

**Figure S5. Hill plot showing cooperativity for C.PvuII binding to WT and altered C-boxes.**

**A.** The natural logarithm of [bound / (1-bound)] is plotted vs. that of C.PvuII concentration. “Bound” refers to low mobility complex for C-box variants from Figure S3A. The intra-operator spacer variants ( $O_L - O_R$ ) are indicated with their calculated Hill coefficient (9).

**B.** Two sets of repeated data are shown. The standard error bar for Hill coefficient was calculated from the correlation coefficient from the residuals using the "summary(lm(y~x))" function from the R statistical package.



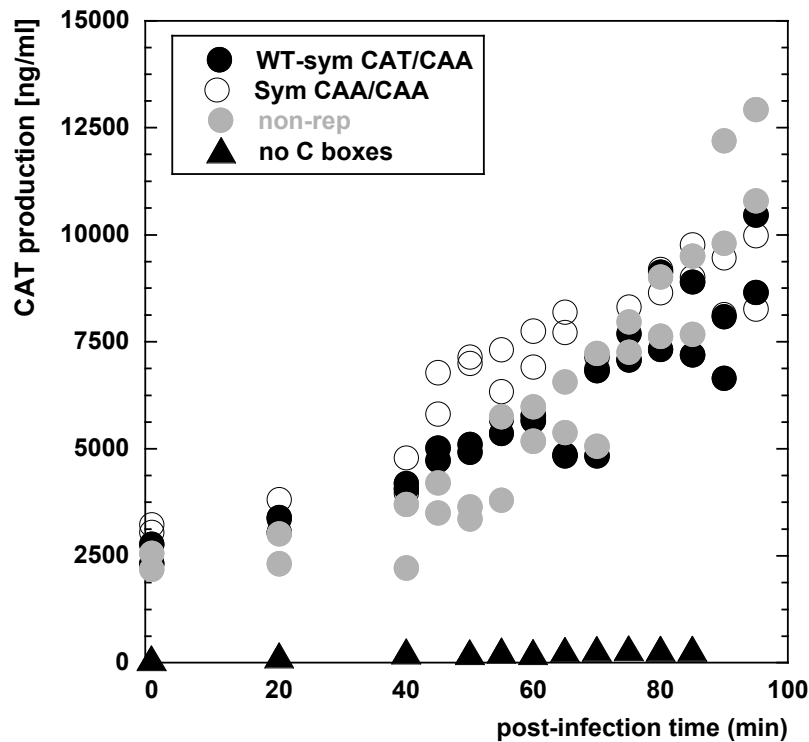

**Figure S6. *In vivo* effects of C-box  $O_L$  spacer variants on temporal expression of C.Pvull**

Four *E. coli* TOP10' cultures, carrying plasmids with different  $O_L$  spacers fused to a *cat* (chloramphenicol acetyltransferase) promoterless reporter gene, were infected with recombinant M13pvullwt phage at MOI=15. We used three spacer variants tested previously in this study: WT-Sym (CAT/CAA; pDK178; closed circles), CAA/CAA (pIM22; open circles) and a WT-Sym, but non-repressing regulatory region (box 2B reversed, pWWWR; grey circles) as a control. The first two variants have identical, symmetrized C-boxes, and differ only at a single nt in the  $O_R$  spacer. A plasmid with no C-box sequence (pKK-238; triangles) was also tested and gave only background levels of *cat* expression. Growth was monitored at  $OD_{600nm}$  before and after phage addition (see Figure 6B), but did not significantly differ between cultures. CAT production in two independently-performed experiments was measured by an ELISA sandwich method (Materials and Methods). These data were normalized for presentation in Figure 6C of the main text.

## REFERENCES

1. Chang, A.C. and Cohen, S.N. (1978) Construction and characterization of amplifiable multicopy DNA cloning vehicles derived from the P15A cryptic miniplasmid. *J Bacteriol*, **134**, 1141-1156.
2. Guzman, L.M., Belin, D., Carson, M.J. and Beckwith, J. (1995) Tight regulation, modulation, and high-level expression by vectors containing the arabinose PBAD promoter. *J Bacteriol*, **177**, 4121-4130.
3. Kim, J., Zwieb, C., Wu, C. and Adhya, S. (1989) Bending of DNA by gene-regulatory proteins: construction and use of a DNA bending vector. *Gene*, **85**, 15-23.
4. Bolivar, F., Rodriguez, R.L., Greene, P.J., Betlach, M.C., Heyneker, H.L. and Boyer, H.W. (1977) Construction and characterization of new cloning vehicles. II. A multipurpose cloning system. *Gene*, **2**, 95-113.
5. Mruk, I., Rajesh, P. and Blumenthal, R.M. (2007) Regulatory circuit based on autogenous activation-repression: roles of C-boxes and spacer sequences in control of the PvuII restriction-modification system. *Nucleic Acids Res*, **35**, 6935-6952.
6. Brosius, J. (1984) Plasmid vectors for the selection of promoters. *Gene*, **27**, 151-160.
7. Diederich, L., Roth, A. and Messer, W. (1994) A versatile plasmid vector system for the regulated expression of genes in *Escherichia coli*. *Biotechniques*, **16**, 916-923.
8. Blumenthal, R.M., Gregory, S.A. and Cooperider, J.S. (1985) Cloning of a restriction-modification system from *Proteus vulgaris* and its use in analyzing a methylase-sensitive phenotype in *Escherichia coli*. *J Bacteriol*, **164**, 501-509.
9. Dahlquist, F. (1978) The meaning of Scatchard and Hill plots. *Methods Enzymol.*, **48**, 270-299.
